# Supplementary material for: Ecological Study of the Vegetation in the Loka Abaya National Park, Ethiopia
Source: Hindawi journal article supplement (doi:10.1155/2024/7765688), 2024-01-27
Supplement: f1 [file 7765688.f1.zip]

Archive with 2 entries (2 files):
- Additional file 2.doc
- Supplementary file 1.doc
